# Supplementary material for: Mitigating the volume expansion and enhancing the cycling stability of ferrous fluorosilicate-modified silicon-based composite anodes for lithium-ion batteries
Source: Royal Society of Chemistry journal article supplement (doi:10.1039/d4ta02532f), 2024-01-01
Supplement: d4ta02532f1.pdf [file d4ta02532f1.pdf]

Supporting Information

**Mitigating Volume Expansion and Enhancing Cycling Stability of Ferrous  
Fluosilicate-Modified Silicon-Based Composite Anodes for Lithium-Ion Batteries**

Jichang Sun,<sup>1,3</sup> Xiaoyi Liu,<sup>1</sup> Penglun Zheng,<sup>3\*</sup> Yang Zhao,<sup>4</sup> Yun Zheng,<sup>1\*</sup> Jingchao Chai,<sup>1</sup> and Zhihong Liu<sup>2\*</sup>

<sup>1</sup> School of Optoelectronic Materials and Technology, Jiangnan University, Wuhan 430056, P. R. China.

<sup>2</sup> State Key Laboratory of Precision Blasting, Jiangnan University, Wuhan 430056, P. R. China.

<sup>3</sup> College of Civil Aviation Safety Engineering, Civil Aviation Flight University of China, Guanghan 618307, P.R. China.

<sup>4</sup> China Institute of Ocean Engineering (Tsing Tao), Qingdao 266555, P. R. China.

\*Email: zhengyun@jhun.edu.cn (Y. Zheng); zhengpenglun@cafuc.edu.cn (P. Zheng); liuzh@jhun.edu.cn (Z. Liu)

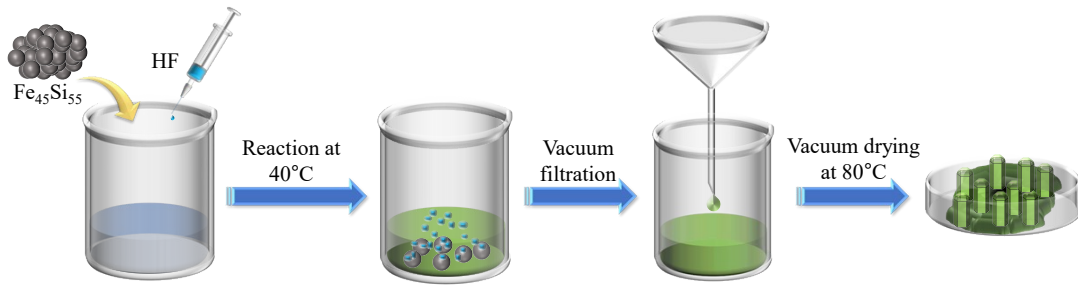

Fig. S1. Schematic illustration for the preparation of FeSiF<sub>6</sub>.

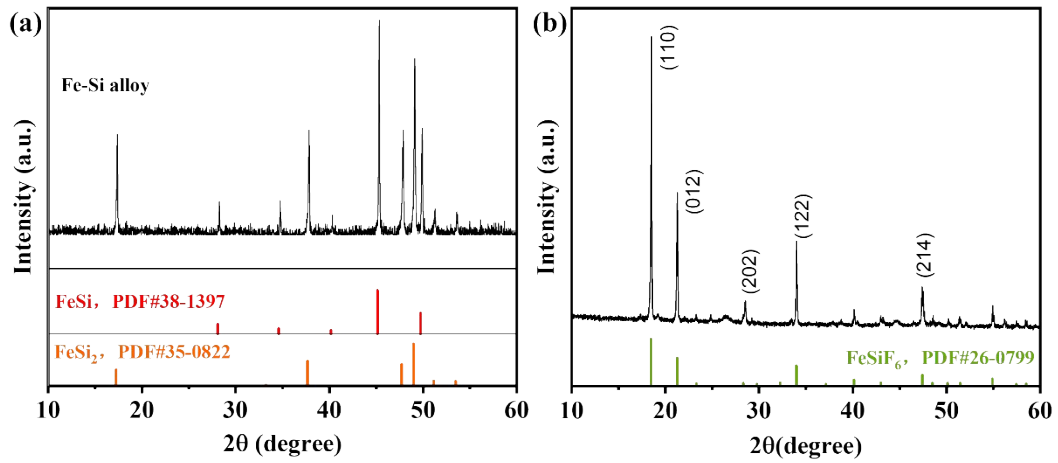

Fig. S2. XRD results of (a) Fe<sub>45</sub>Si<sub>55</sub> and (b) as-synthesized FeSiF<sub>6</sub> composites.

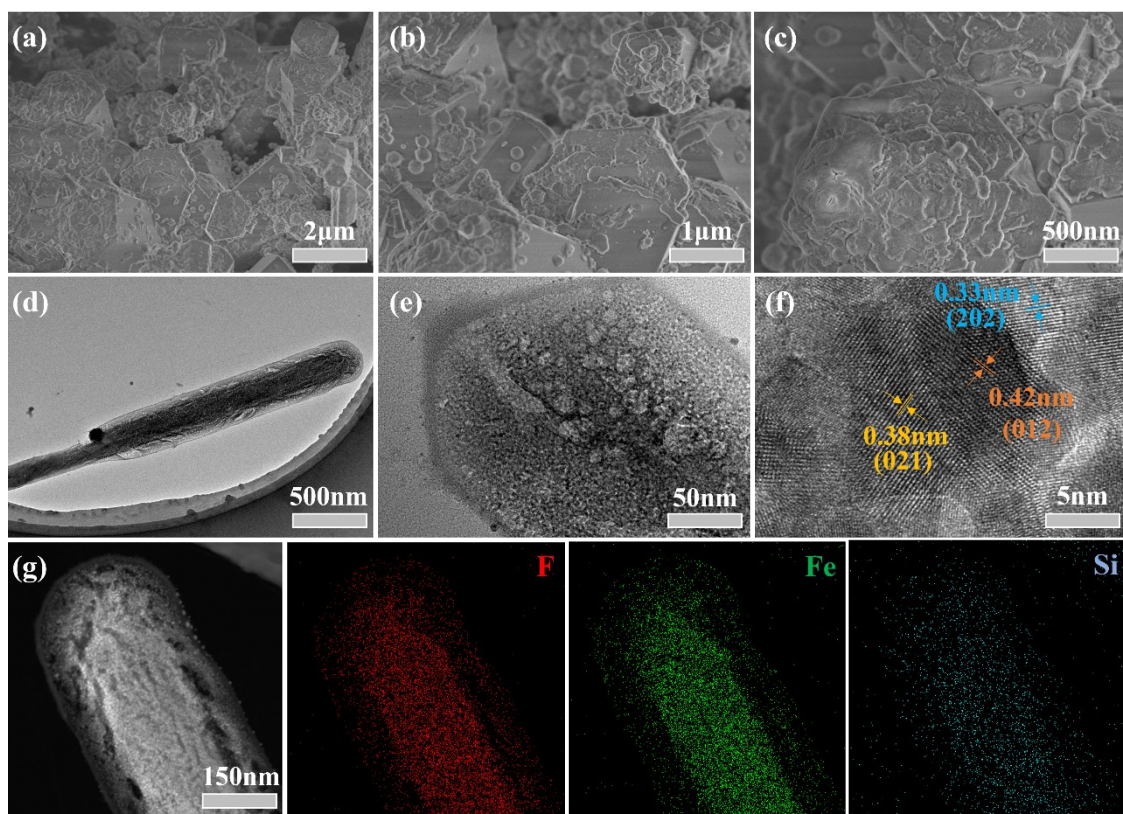

Fig. S3. (a)-(c) SEM images of pristine  $\text{FeSiF}_6$  crystals. (d)-(e) TEM images of pristine  $\text{FeSiF}_6$  crystals. (f) Inverse FFT image of which shows (202), (012) and (021) lattice planes of  $\text{FeSiF}_6$ . (e) HAADF-STEM image of a single  $\text{FeSiF}_6$  wire, (f-h) The corresponding elemental mapping results of F, Fe and Si.

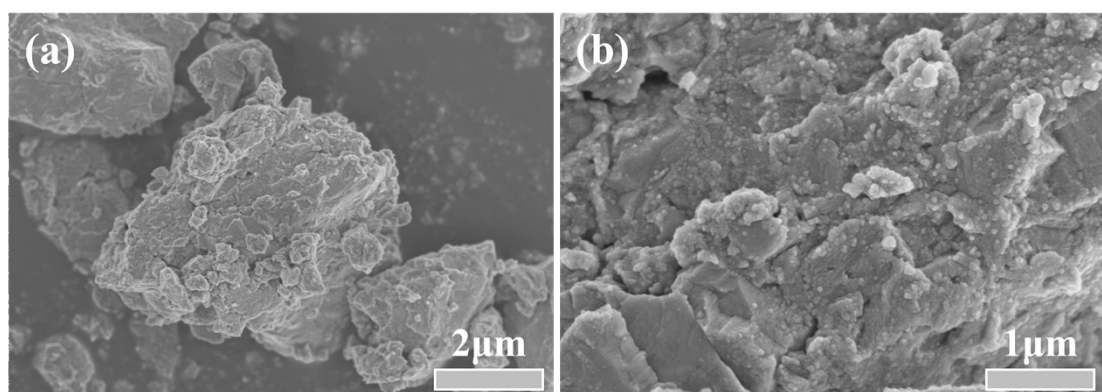

Fig. S4. (a)-(b) SEM images of pristine  $\text{Fe}_{45}\text{Si}_{55}$  crystals.

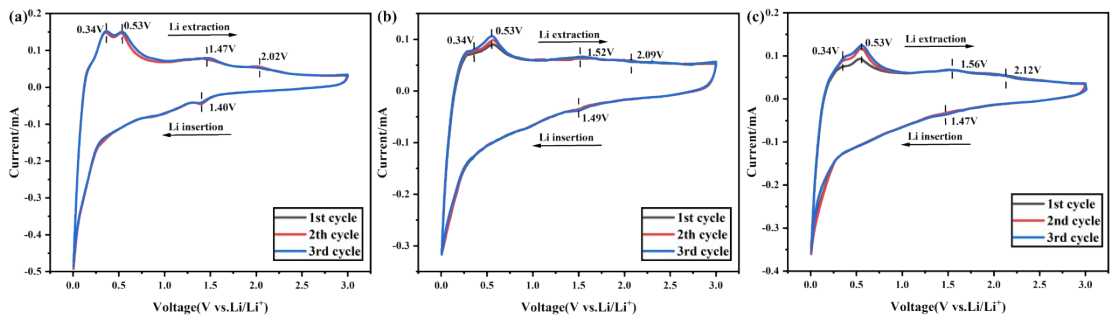

Fig. S5. Cyclic voltammetry profiles of (a) Fe-Si@C-T, (b) Fe-Si-T@C and (c) Fe-Si@F@C electrodes at a sweep rate of  $0.5 \text{ mV s}^{-1}$ .

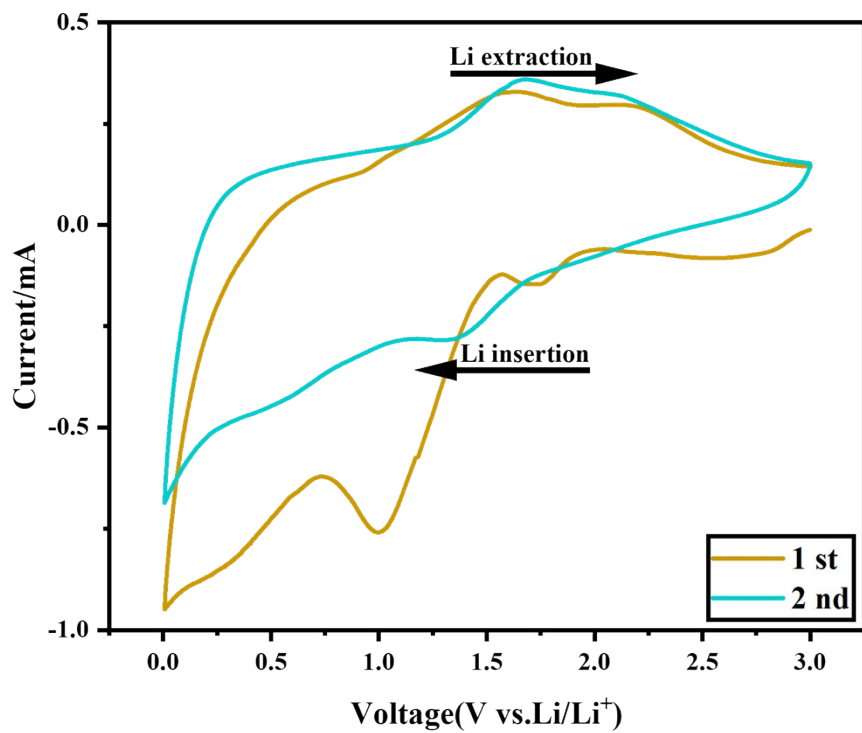

Fig. S6. Cyclic voltammetry profiles of FeSiF<sub>6</sub> composite anode in the initial five cycles at a sweep rate of  $0.1 \text{ mV/s}$ .

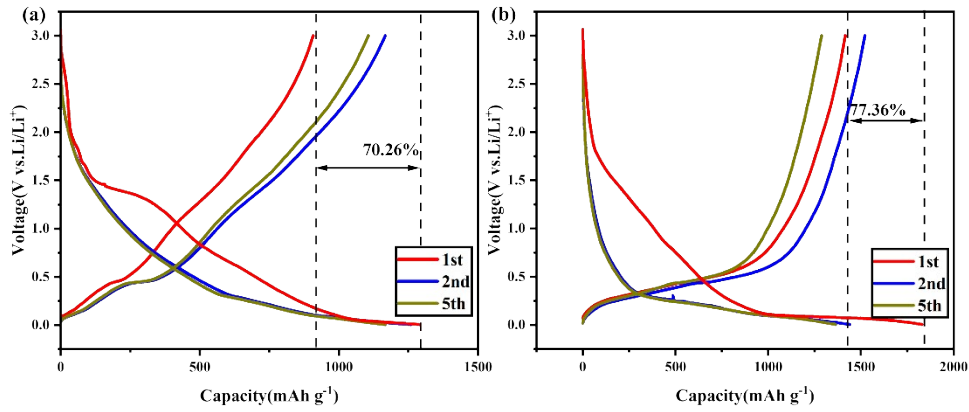

Fig. S7. Galvanostatic charge-discharge curves of (a) Fe-Si@C-T and (b) Fe-Si-T@C.

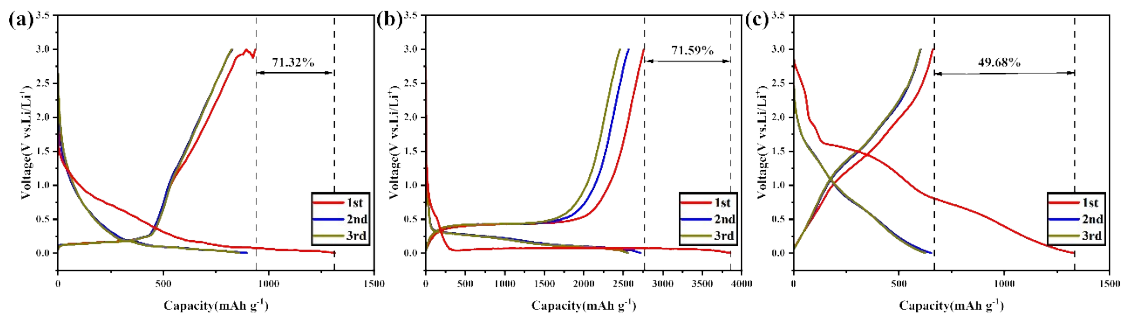

Fig. S8. GCD curves of (a) graphite (b) Si and (c) FeSiF<sub>6</sub> in the 1<sup>st</sup>, 2<sup>nd</sup> and 3<sup>rd</sup> cycles measured at 0.1A g<sup>-1</sup>.

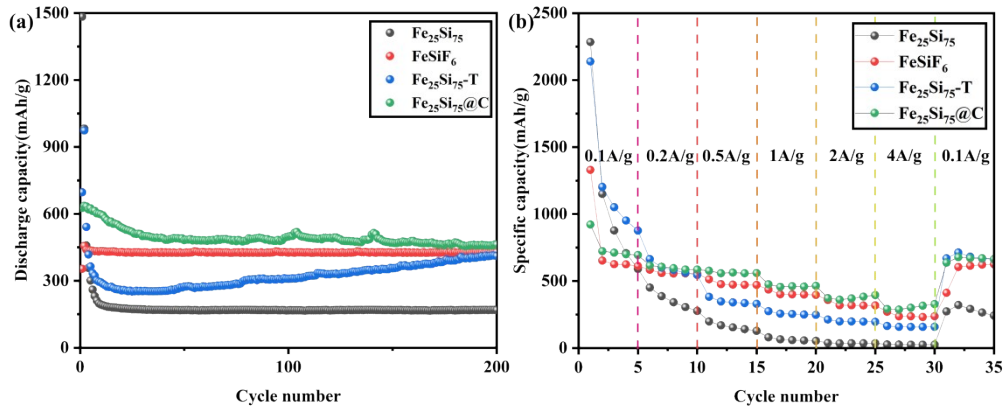

Fig. S9. (a) Cycling performance of Fe<sub>25</sub>Si<sub>75</sub>, FeSiF<sub>6</sub>, Fe<sub>25</sub>Si<sub>75</sub>-T, and Fe<sub>25</sub>Si<sub>75</sub>@C at a current density of 1 A/g and corresponding fit curves. (b) Rate performance of Fe<sub>25</sub>Si<sub>75</sub>, FeSiF<sub>6</sub>, Fe<sub>25</sub>Si<sub>75</sub>-T, and Fe<sub>25</sub>Si<sub>75</sub>@C at different current densities.

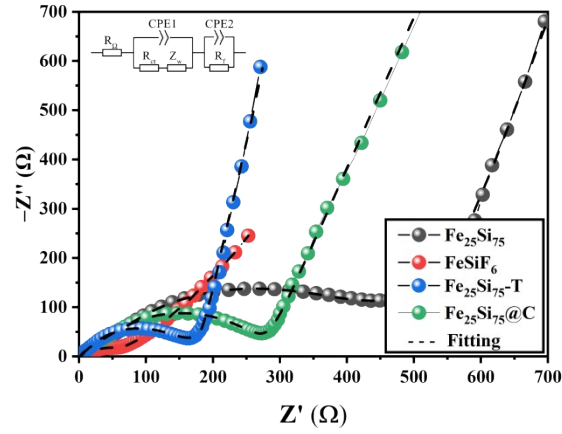

Fig. S10. EIS spectra of  $\text{Fe}_{25}\text{Si}_{75}$ ,  $\text{FeSiF}_6$ ,  $\text{Fe}_{25}\text{Si}_{75}\text{-T}$  and  $\text{Fe}_{25}\text{Si}_{75}\text{@C}$  with a scan rate of 0.1 mV/s. The inset shows the equivalent circuit model used for EIS curve fitting.

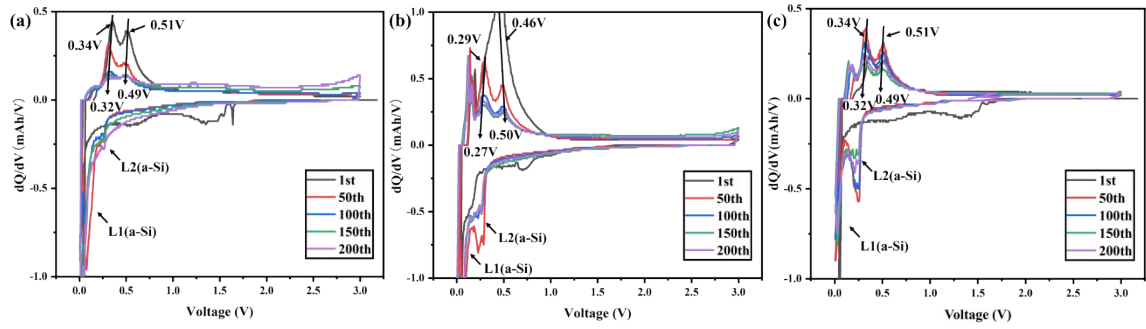

Fig. S11. The differential capacity curves of (a)  $\text{Fe-Si@C-T}$ , (b)  $\text{Fe-Si-T@C}$ , and (c)  $\text{Fe-Si@F@C}$  after different cycles at 1A/g.

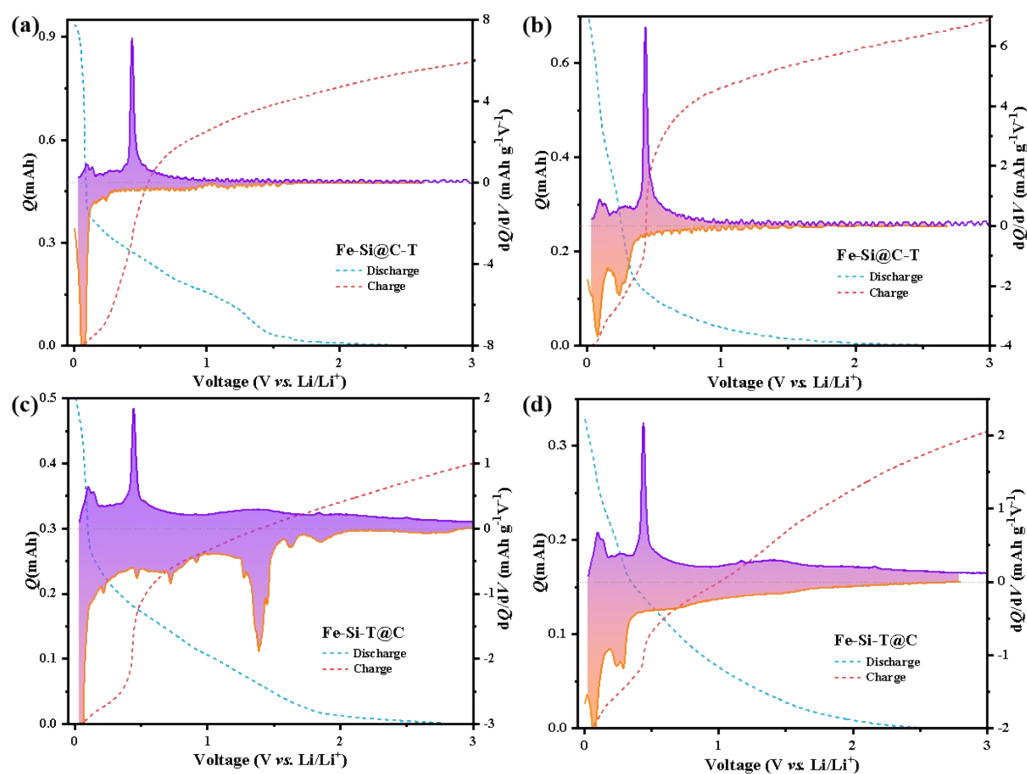

Fig. S12. Differential capacity curves for cycles of Fe-Si@C-T at (a) 1st cycle and (b) 5th cycle at 0.1A/g. (c) Differential capacity curves of Fe-Si-T@C in (a) 1st cycle and (b) 5th cycle at 0.1A/g.

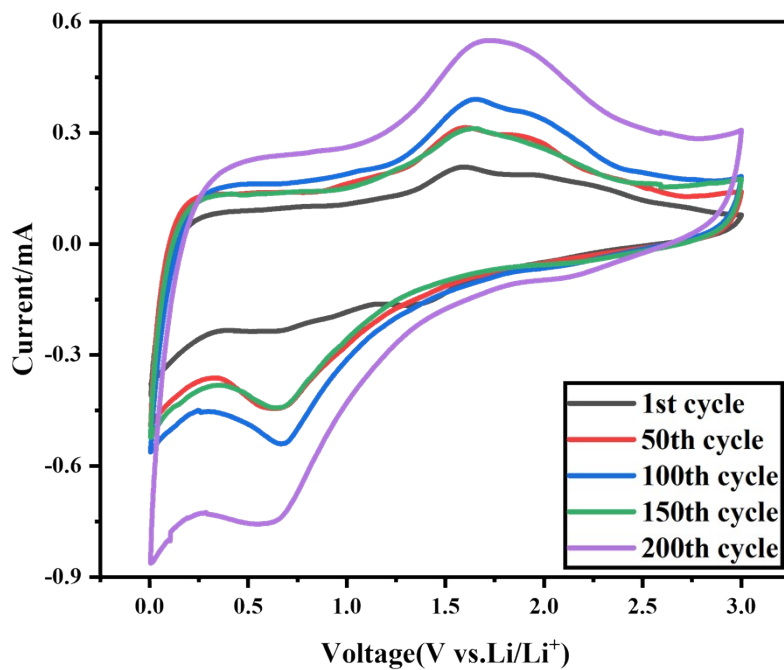

Fig. S13. Cyclic voltammety profiles of FeSiF<sub>6</sub> anode in the initial five cycles at a sweep rate of 0.5 mV s<sup>-1</sup>.



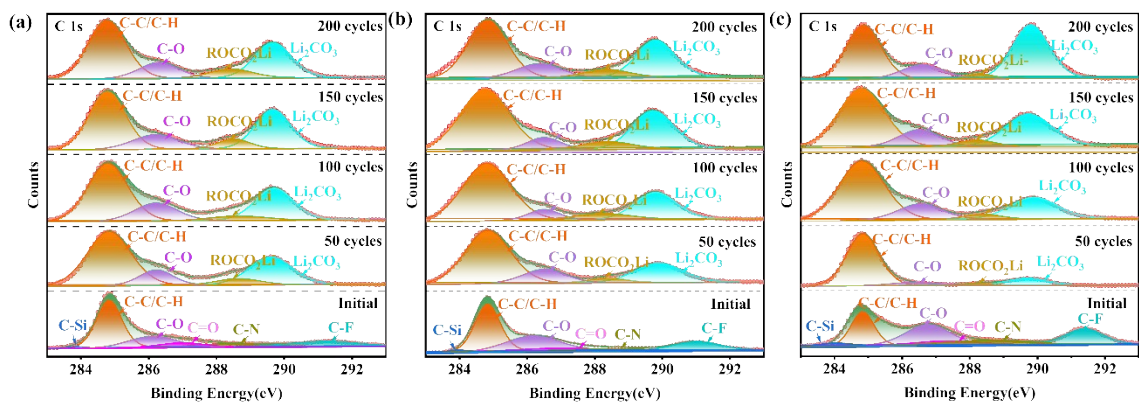

Fig. S14. High-resolution XPS spectra of C 1s of (a) Fe<sub>25</sub>Si<sub>75</sub>, (b) FeSiF<sub>6</sub>, and (c) Fe-Si@F@C under different cycle times.

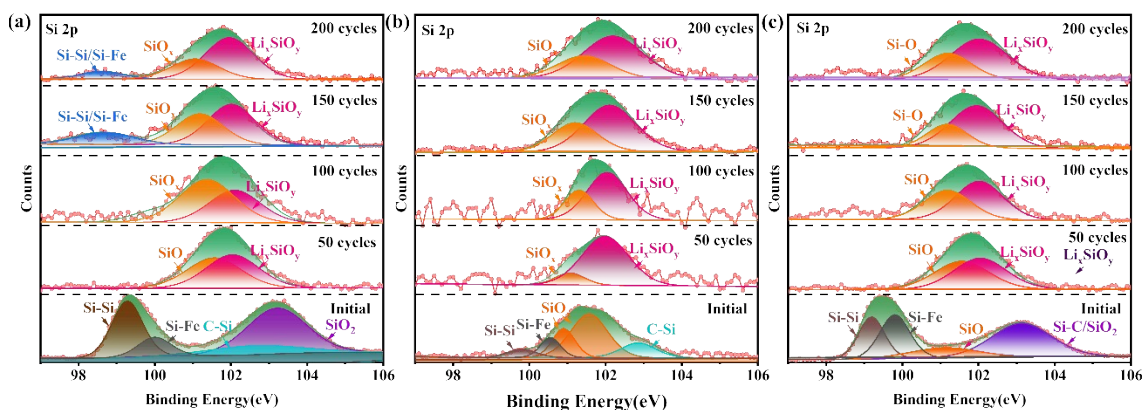

Fig. S15. High-resolution XPS spectra of Si 2p of (a) Fe<sub>25</sub>Si<sub>75</sub>, (b) FeSiF<sub>6</sub>, and (c) Fe-Si@F@C under different cycle times.

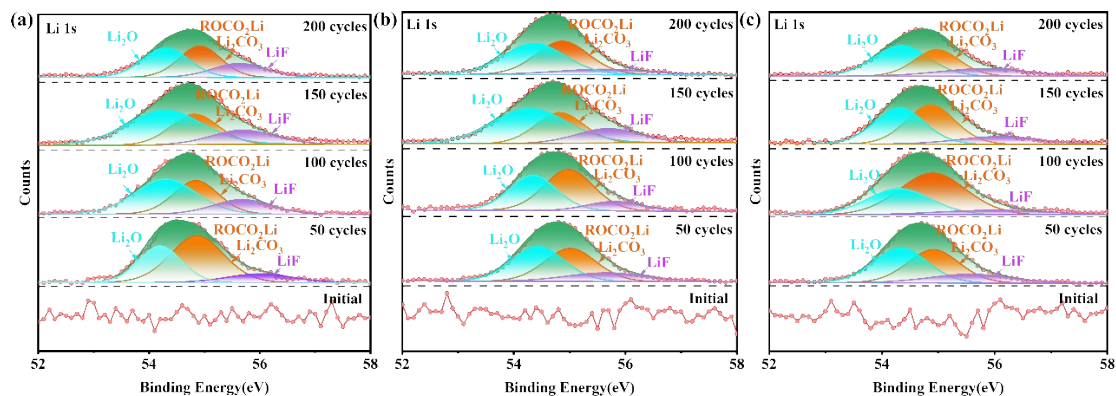

Fig. S16. High-resolution XPS spectra of Li 1s of (a) Fe<sub>25</sub>Si<sub>75</sub>, (b) FeSiF<sub>6</sub>, and (c) Fe-Si@F@C under different cycle times.



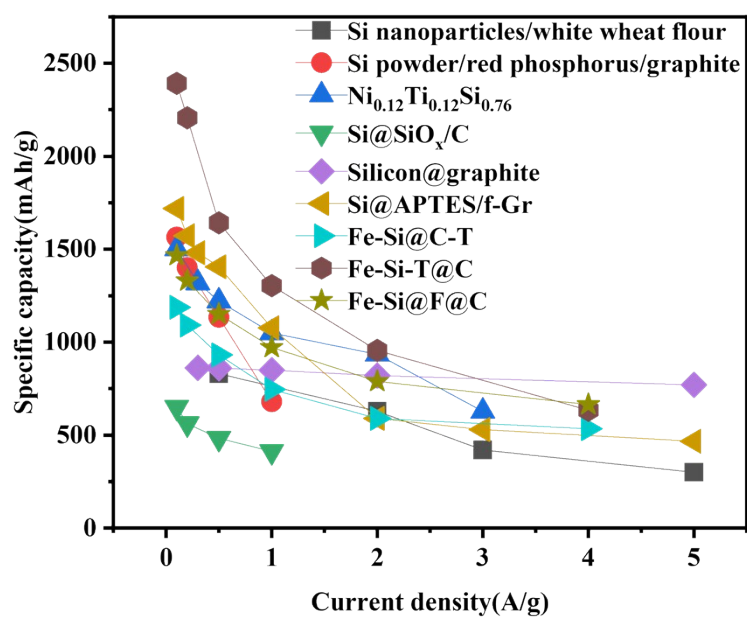

Fig. S17. Comparison of specific capacities of Fe-Si@C-T, Fe-Si-T@C, Fe-Si@F@C (this study), and other silicon-based composite anodes in literature.

Table S1. Performance comparison of silicon-based composite anodes.

| Materials                                                | Synthetic method                                  | Synthetic method     | Initial CE (%) | Anode performance                                        | Rate                   | Reference |
|----------------------------------------------------------|---------------------------------------------------|----------------------|----------------|----------------------------------------------------------|------------------------|-----------|
| Si nanoparticles/white wheat flour                       | Ball milling and annealing                        | Core shell           | 71             | 880 mAh g <sup>-1</sup><br>92% retention after 90 cycles | 210 mA g <sup>-1</sup> | 1         |
| Si powder/red phosphorus/graphite                        | Ball milling                                      | Core shell           | 64.7           | 883.4 mAh g <sup>-1</sup> after 200 cycles               | 200 mA g <sup>-1</sup> | 2         |
| Micronized Si/citric acid                                | Ball milling and carbonization                    | Core shell           | 82             | 850 mAh g <sup>-1</sup> after 100 cycles                 | 210 mA g <sup>-1</sup> | 3         |
| Amorphous-Si@SiO <sub>x</sub> /C                         | Ball milling and carbonization of the citric acid | Core shell           | 82             | 1230 mAh g <sup>-1</sup> after 100 cycles                | 500 mA g <sup>-1</sup> | 4         |
| N-doped carbon embedding Si nanoparticles                | ball milling and pyrolysis carbonization          | Core shell           | 80.8           | 794.7 mAh g <sup>-1</sup> after 1000 cycles              | 1 A g <sup>-1</sup>    | 5         |
| Ni <sub>0.12</sub> Ti <sub>0.12</sub> Si <sub>0.76</sub> | One-step ball-milling method                      | The ternary compound | 81.8           | 500 mAh g <sup>-1</sup> after 50 cycles                  | 840 mA g <sup>-1</sup> | 6         |
| Si@SiO <sub>x</sub> /C                                   | Two-step ball-milling                             | Core shell           | 82             | 726 mAh g <sup>-1</sup> after 500 cycles                 | 100 mA g <sup>-1</sup> | 7         |
| Silicon@graphite                                         | a facile and scalable ball milling                | Core shell           | 77             | 646.5 mAh g <sup>-1</sup> after 100 cycles               | 200 mA g <sup>-1</sup> | 8         |

## References

- [1] TANG J, DYSART A D, KIM D H, et al. Fabrication of carbon/silicon composite as lithium-ion anode with enhanced cycling stability. *Electrochimica Acta*, 2017, 247: 626-633.
- [2] HUANG S, CHEONG L-Z, WANG D, et al. Nanostructured phosphorus doped silicon/graphite composite as anode for high-performance lithium-ion batteries. *ACS Applied Materials & Interfaces*, 2017, 9(28): 23672-23678.
- [3] KOBAYASHI N, INDEN Y, ENDO M. Silicon/soft-carbon nanohybrid material with low expansion for high capacity and long cycle life lithium-ion battery. *Journal of Power Sources*, 2016, 326: 235-241.
- [4] WANG D, GAO M, PAN H, et al. High performance amorphous-Si@ SiO<sub>x</sub>/C composite anode materials for Li-ion batteries derived from ball-milling and in situ carbonization. *Journal of Power Sources*, 2014, 256: 190-199.
- [5] HAN J, ZHAO C, WANG L, et al. Simple ball milling-assisted method enabling N-doped carbon embedded Si for high performance lithium-ion battery anode. *Journal of Alloys and Compounds*, 2023, 966: 171668.
- [6] LADAM A, BIBENT N, CÉNAC-MORTHÉ C, et al. One-pot ball-milling synthesis of a Ni-Ti-Si based composite as anode material for Li-ion batteries. *Electrochimica Acta*, 2017, 245: 497-504.
- [7] QIAN L, LAN J-L, XUE M, et al. Two-step ball-milling synthesis of a Si/SiO<sub>x</sub>/C composite electrode for lithium ion batteries with excellent long-term cycling stability. *RSC Advances*, 2017, 7(58): 36697-36704.
- [8] CABELLO M, GUCCIARDI E, HERRÁN A, et al. Towards a high-power Si@ graphite anode for lithium ion batteries through a wet ball milling process. *Molecules*, 2020, 25(11): 2494.
